# Supplementary material
Source: PubMed Central journal article supplement (PMC3683805)

## Supplemental Data

### Supplemental Fig.1: Western blot of GnRH-induced $\beta$ -catenin nuclear accumulation in L $\beta$ T2 cells

**A**, Time course of GnRH-stimulated nuclear accumulation of  $\beta$ -catenin in L $\beta$ T2 cells. Cells were treated with 10 nM GnRH for the times indicated. Nuclear extracts were subjected to a quantitative Western blot analysis using a  $\beta$ -catenin-specific antibody. LSD1 (in red) was used as a loading control. **B**, Quantification of Western blot densitometry from three independent experiments, plotted as mean  $\pm$  SEM. Significance values at each time point in comparison with time 0 (control) obtained by t-test and Bonferroni corrections (0.25h, 0.5h, 1h, 2h, 4h, 6h):  $P < .01$ ,  $P < .01$ ,  $P < .01$ ,  $P < .05$ ,  $P < .01$ ,  $P < .01$ , respectively.

### Supplemental Fig.2: Effects of two JNK inhibitors on GnRH-induced $\beta$ -catenin nuclear accumulation and FSH $\beta$ mRNA expression

**A**, Cells were serum-starved overnight, pretreated with 20  $\mu$ M JNK inhibitor III for 45 min, and stimulated with 10 nM GnRH or vehicle for 15 min. Nuclear extracts were subjected to a quantitative Western blot analysis using a  $\beta$ -catenin-specific antibody. LSD1 (in red) was used as a loading control. **B**, Quantification of Western blot densitometry from three independent experiments, plotted as mean  $\pm$  SEM. Two-way ANOVA  $n=3$ ; \*  $P < 0.05$ . **C**, Cells were serum-starved overnight, pretreated with either 5, 15 or 45  $\mu$ M SP600125 for 30 min, and stimulated with 10 nM GnRH or vehicle for 15 min. Nuclear extracts were subjected to a quantitative Western blot analysis using a  $\beta$ -catenin-specific antibody. LSD1 (in red) was used as a loading control. **D**, Quantification of Western blot densitometry from three independent experiments, plotted as mean  $\pm$  SEM. Two-way ANOVA  $n=3$ ; \*  $P < 0.05$ , \*\*  $P < 0.01$ . **E**, Cells were serum-starved overnight, pretreated with 20  $\mu$ M JNK inhibitor III for 45 min, and stimulated with slow of

5 nM GnRH for 6 h. Samples were collected 30 min after the last pulse. Relative mRNA copy numbers of FSH $\beta$  were determined by quantitative real time-PCR. Two-way ANOVA n=4; \*\*  $P<0.01$ .

### **Supplemental Fig.3: Effect of SP600125 on GSK3 phosphorylation in GnRH-stimulated L $\beta$ T2 cells**

**A**, Cells were serum-starved overnight, pretreated with 40  $\mu$ M SP600125 for 30 min, and stimulated with 10 nM GnRH or vehicle for 15 min. Whole cell lysates were subjected to a quantitative Western blot analysis using a specific antibody against phospho-GSK3 $\alpha/\beta$  Ser<sup>21/9</sup>. GAPDH (in green) was used as a loading control. **B-C**, Quantification of Western blot densitometry from three independent experiments, plotted as mean  $\pm$  SEM. The levels of phospho-GSK3 $\alpha$  (**B**) or phospho-GSK3 $\beta$  (**C**) were normalized to GAPDH. Two-way ANOVA n=3; \*  $P<0.05$ , \*\*  $P<0.01$ .

### **Supplemental Fig.4: Effect of $\beta$ -catenin gene silencing on GnRH-induced expression of candidate target genes**

L $\beta$ T2 cells were transfected with 0.6  $\mu$ g of either scrambled or  $\beta$ -catenin siRNA for 48 h, serum-starved overnight, and stimulated with 10 nM GnRH or vehicle for 1 h. RNA copy numbers of c-jun, Nur77, Pitx1, Pitx2,  $\beta$ -catenin, and GAPDH were determined by quantitative real time-PCR. Two-way ANOVA n=4; \*\*  $P<0.01$ . Primer sequences were as follows: GAPDH/Sense, 5'-TGC GAC TTC AAC AGC AAC TC-3'; GAPDH/Antisense, 5'-CTT GCT CAG TGT CCT TGC TG-3';  $\beta$ -catenin/Sense, 5'-CAT TAC TAA CTG GGA GCG TG-3';  $\beta$ -catenin/Antisense, 5'-GAC CCC GTG AGT CTT TAC AG-3'; c-jun/Sense, 5'-TGA AAG CTG TGT CCC CTG TC-3'; c-jun/Antisense, 5'-ATC ACA GCA CAT GCC ACT TC-3'; Nur77/Sense, 5'-GGG TGA CCC CAC TAT TTG TC-3'; Nur77/Antisense, 5'-CGG AAG AGA TCT CGA GTT GG-3'; pitx1/Sense, 5'-GCC AGC AGC AGG AGG AGA A-3'; pitx1/Antisense, 5'-GCA GGC GGA CAG TGG AGA A-3'; pitx2/Sense, 5'-GTG CGC ACT ATG GGA AGG AA-3'; pitx2/Antisense, 5'-CGT CCT CCA ACT GTT GGG AA-3'.

Supplemental Figure 1

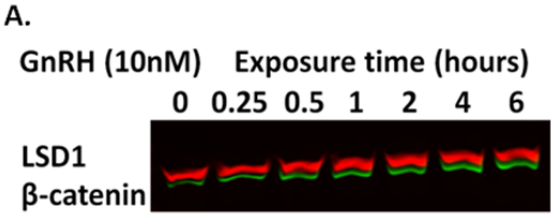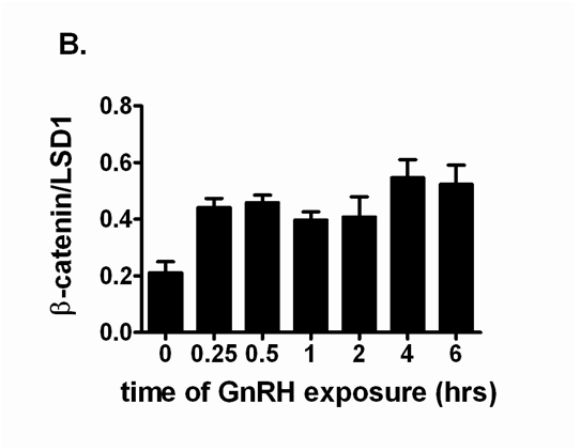

Supplemental Figure 2

A.

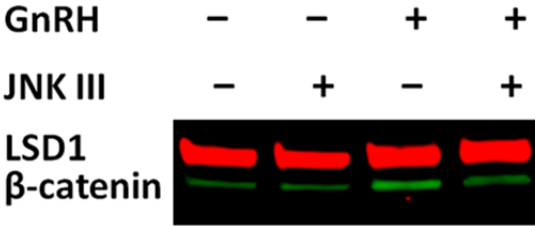

B.

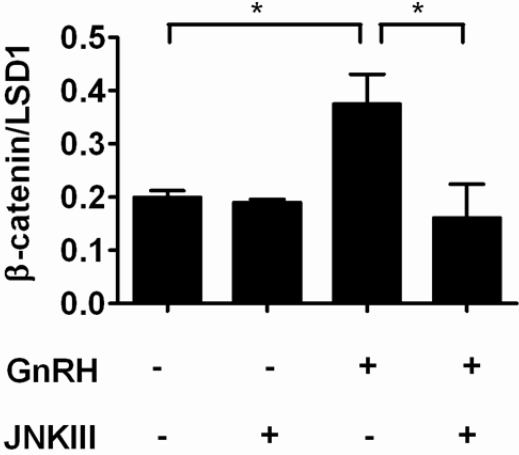

C.

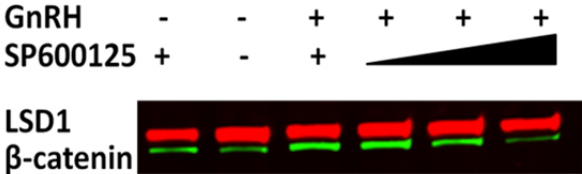

D

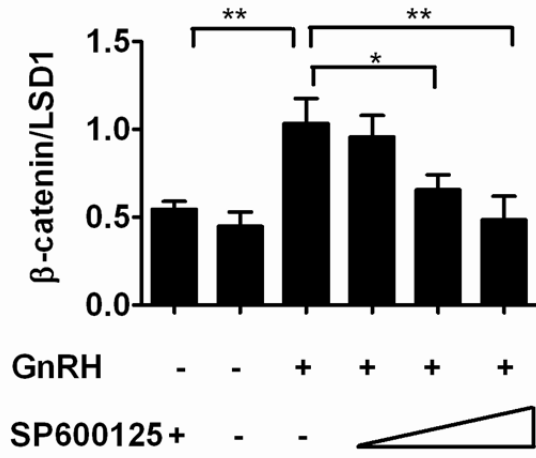

E.

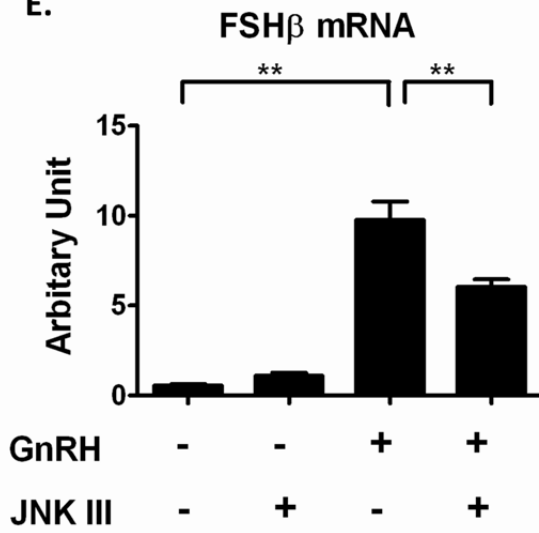

Supplemental Figure 3

A.

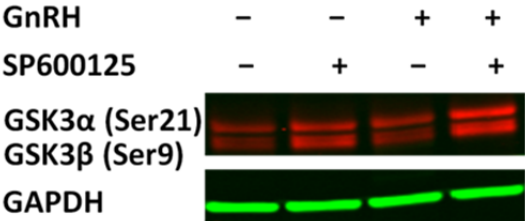

B.

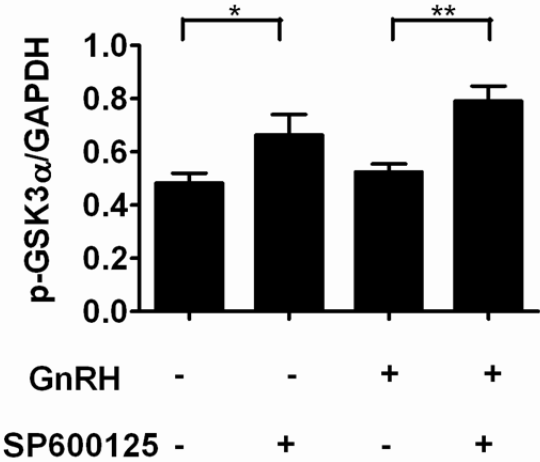

C.

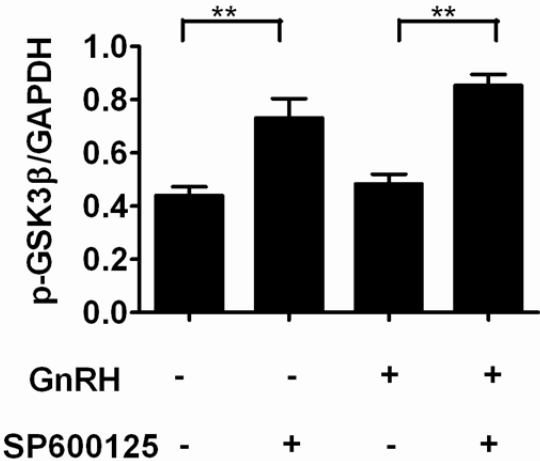

Supplemental Figure 4

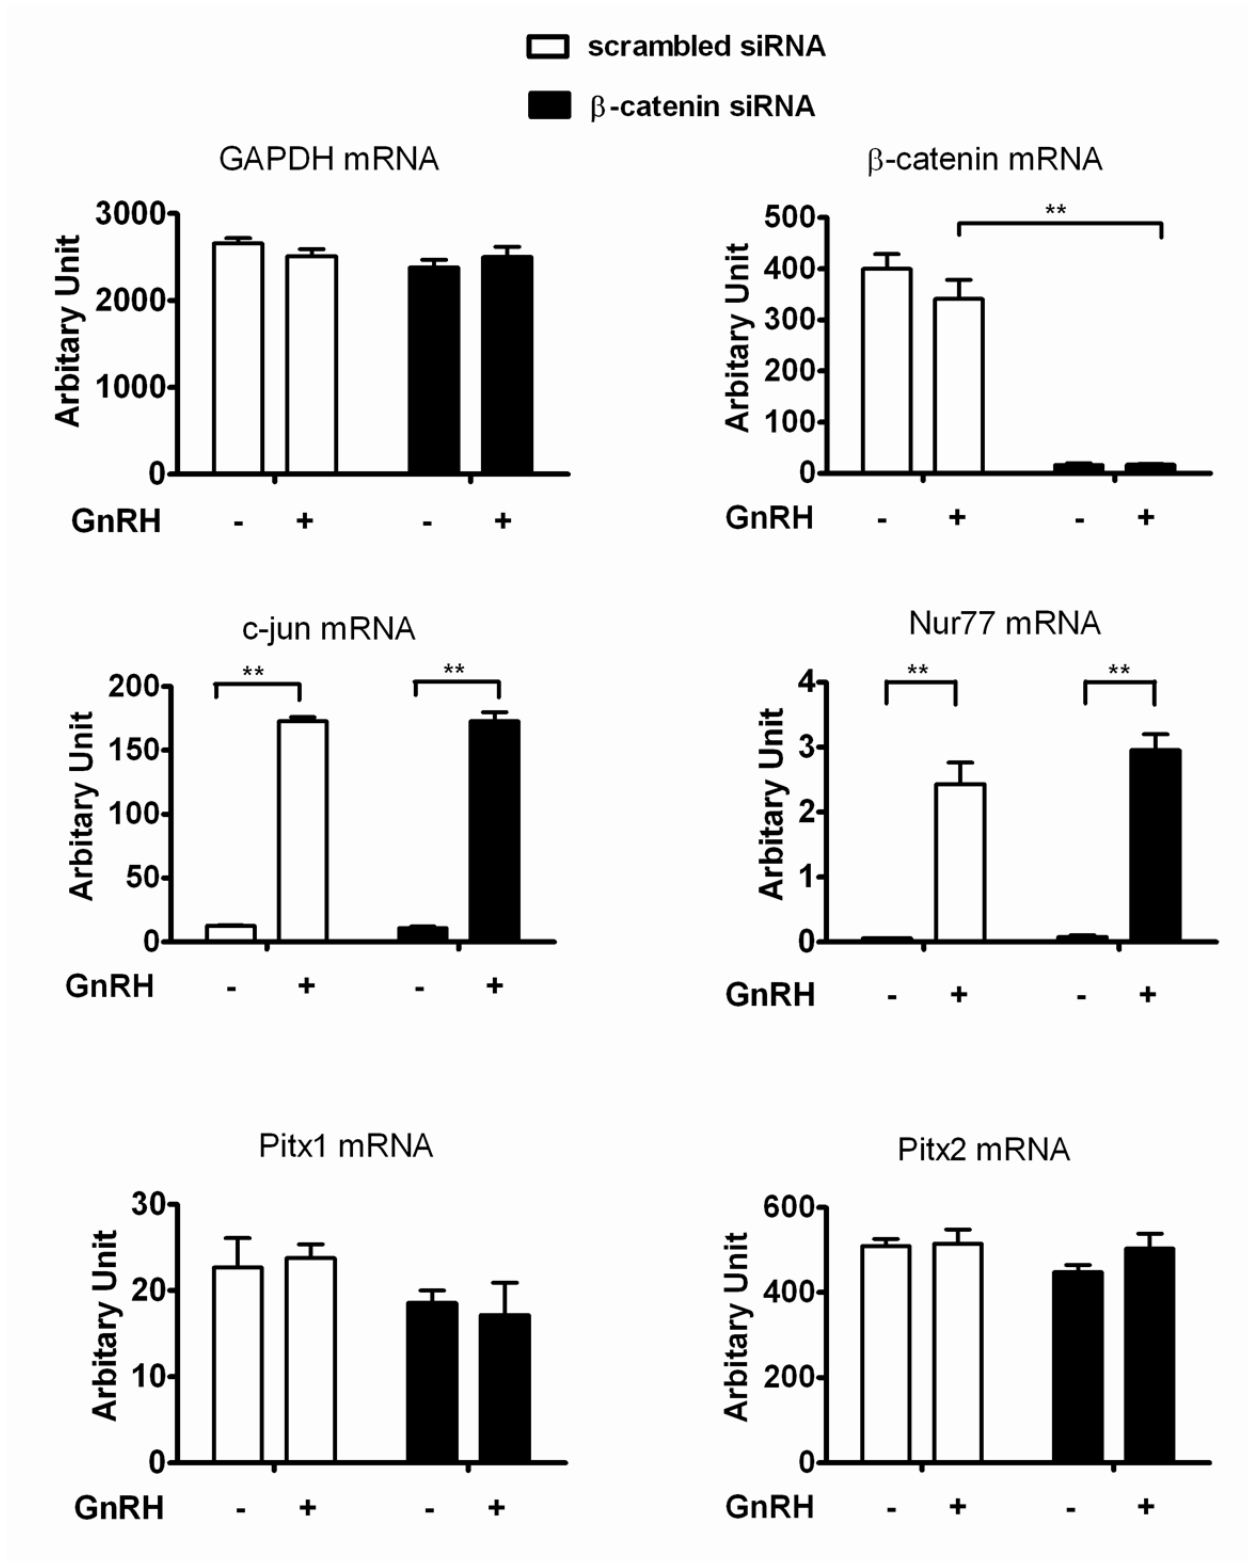

Supplement: supp_me.2012-1310_ME-12-1310_Suppl.materials.pdf [file supp_me.2012-1310_ME-12-1310_Suppl.materials.pdf]
